# Supplementary material for: An alternative negative pressure treatment for enteroatmospheric fistula resulting from small intestinal leakage caused by incision dehiscence
Source: PubMed Central journal article supplement — Heliyon. 2023 Nov 4;9(11):e22045. doi: 10.1016/j.heliyon.2023.e22045 (PMC10663902; doi:10.1016/j.heliyon.2023.e22045), 2023-11-04
Supplement: mmc1.pdf [file mmc1.pdf]

### **Form to confirm authorship changes for Heliyon**

This form must be **signed by all authors** when there is a change in authorship which includes changes to any of the following items: author name(s), order of the authors, the corresponding author(s), the addition of authors, the removal of authors and changes in affiliation.

By personally signing this note, **all** authors confirm that: I) the changes are in accordance with their scientific contribution, II) they agree with all the changes and III) confirm that the authorship list conforms to the authorship criteria outlined on [Heliyon's ethics page](#). IV) it is the responsibility of the corresponding author to get the signature from all co-authors accepting the change. In case of any ethic violation/malpractice in the signature, the corresponding author is accountable. The completed form should be returned along with the final/revised manuscript to proceed further with the manuscript. Manuscripts for which incomplete forms have been submitted will be rejected within 5 working days.

Any disputes on the authorship list and contributions need to be resolved by the involved scientists and *Heliyon* will only proceed with the evaluation of the manuscript once we receive confirmation, through this form, that such an agreement between the authors has been reached.

***Heliyon* will not accept changes to the authorship list in the late stages of the editorial process (when a paper is in Accept in Principle stage, acceptance or after publication)**

Manuscript number: HELIYON-

Article title: An alternative negative pressure treatment for enteroatmospheric fistula resulting from small intestinal leakage caused by incision dehiscence

Complete new author list: Ran Sun; Xin Xu; Shikun Luo; Risheng Zhao; Weiliang Tian; Ming Huang; Zheng Yao

Date:

| # | First name | Last name | Dept. & Institution name                        | Institutional email address | Order change (Y/N) | Addition / Deletion | Change in Author name (Y/N) | Affiliation Change (Y/N) | Reason for the change                                                                                       | Signature                                                                             |
|---|------------|-----------|-------------------------------------------------|-----------------------------|--------------------|---------------------|-----------------------------|--------------------------|-------------------------------------------------------------------------------------------------------------|---------------------------------------------------------------------------------------|
| 1 | Ran        | Sun       | Department of general surgery, Jinling Hospital | Njzy.@njmu.edu.cn           | N                  | Yes                 | N                           | N                        | Add Ran sun as the first author because both the first and second rounds of revision are led by this person | 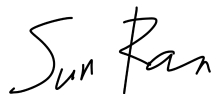 |

|   |         |      |                                                   |                   |   |   |   |   |                                                                                                                                                                                                                                                                                                                                                                                                                                                                                                                                                      |                                                                                       |
|---|---------|------|---------------------------------------------------|-------------------|---|---|---|---|------------------------------------------------------------------------------------------------------------------------------------------------------------------------------------------------------------------------------------------------------------------------------------------------------------------------------------------------------------------------------------------------------------------------------------------------------------------------------------------------------------------------------------------------------|---------------------------------------------------------------------------------------|
| 2 | Xin     | Xu   | Department of general surgery, Jiangning Hospital | Jnyy.@njmu.edu.cn | N | N | N | N |                                                                                                                                                                                                                                                                                                                                                                                                                                                                                                                                                      | 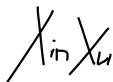   |
| 3 | Shikun  | Luo  | Department of general surgery, Jiangning Hospital | Jnyy.@njmu.edu.cn | Y | N | N | N | Shikun Luo is changed from corresponding author to co-first author, and Risheng Zhao is changed from co-first author to corresponding author. Because Shikun Luo reanalyzed the data during the revise process and made significant contributions to the revision. However, due to being transferred to another treatment group, the data holder became Risheng Zhao. Risheng Zhao, although he contributed to the manuscript writing, currently holds the responsibility of data preservation. Therefore, he is changed to the corresponding author | 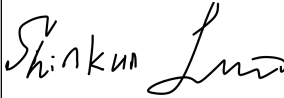   |
| 4 | Risheng | Zhao | Department of general surgery, Jiangning Hospital | Jnyy.@njmu.edu.cn | Y | N | N | N | Shikun Luo is changed from corresponding author to co-first author, and Risheng Zhao is changed from co-first author to corresponding author. Because Shikun Luo reanalyzed the data during the revise process and made significant contributions                                                                                                                                                                                                                                                                                                    | 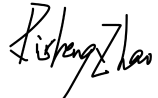 |

|   |          |       |                                                   |                   |   |   |   |   |                                                                                                                                                                                                                                                                                                          |                                                                                       |
|---|----------|-------|---------------------------------------------------|-------------------|---|---|---|---|----------------------------------------------------------------------------------------------------------------------------------------------------------------------------------------------------------------------------------------------------------------------------------------------------------|---------------------------------------------------------------------------------------|
|   |          |       |                                                   |                   |   |   |   |   | to the revision.<br>However, due to being transferred to another treatment group, the data holder became Risheng Zhao. Risheng Zhao, although he contributed to the manuscript writing, currently holds the responsibility of data preservation.<br>Therefore, he is changed to the corresponding author |                                                                                       |
| 5 | Weiliang | Tian  | Department of general surgery, Jinling Hospital   | Njzy.@njmu.edu.cn | N | N | N | N |                                                                                                                                                                                                                                                                                                          | 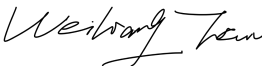   |
| 6 | Ming     | Huang | Department of general surgery, Jiangning Hospital | Jnyy.@njmu.edu.cn | N | N | N | N |                                                                                                                                                                                                                                                                                                          | 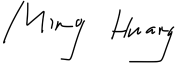   |
| 7 | Zheng    | Yao   | Department of general surgery, Jiangning Hospital | Jnyy.@njmu.edu.cn | N | N | N | N |                                                                                                                                                                                                                                                                                                          | 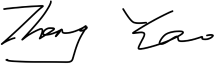 |
